# Supplementary material for: Automated wideline nuclear quadrupole resonance of mixed-cation lead halide perovskites
Source: Copernicus journal article supplement (doi:10.5194/mr-2025-2), 2025-02-14
Supplement: Supplementary file 1 [file mr-2025-2-supplement.pdf]

Supporting Information for  
**Automated wideline nuclear quadrupole resonance  
of mixed-cation lead halide perovskites**

Jop W. Wolffs<sup>1</sup>, Jennifer S. Gómez<sup>1</sup>, Gerrit E. Janssen<sup>1</sup>, Gilles A. de Wijs<sup>1</sup>, and Arno P. M. Kentgens<sup>1</sup>

<sup>1</sup>Radboud Universiteit, Institute for Molecules and Materials, Heyendaalseweg 135, NL-6525 AJ Nijmegen, The Netherlands Correspondence: Arno P. M. Kentgens (a.kentgens@nmr.ru.nl)

**Correspondence:** Arno P. M. Kentgens (a.kentgens@nmr.ru.nl)

## A $^1\text{H}$ and $^1\text{H}\rightarrow^{13}\text{C}$ MAS NMR of $\text{MA}_x\text{FA}_{1-x}\text{Pb}_3$

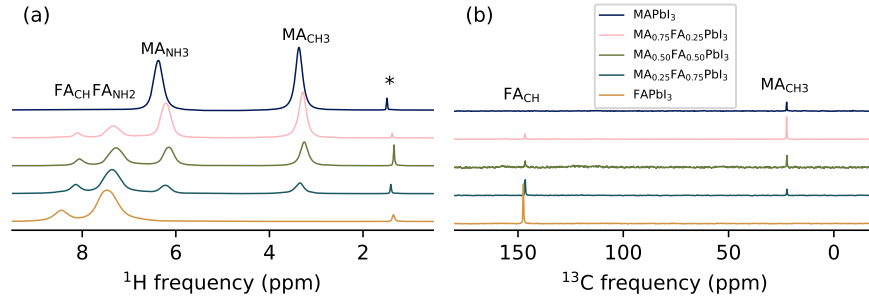

Figure S1: (a)  $^1\text{H}$  MAS and (b)  $^1\text{H}\rightarrow^{13}\text{C}$  CPMAS spectra of  $\text{MA}_x\text{FA}_{1-x}\text{Pb}_3$  ( $x = 1.00, 0.75, 0.50, 0.25, 0.00$  from top to bottom). The asterisk in the  $^1\text{H}$  MAS spectrum indicates a cyclohexane impurity resulting from wet-milling synthesis. Number of scans and intensity scaling varies, especially for the  $^1\text{H}\rightarrow^{13}\text{C}$  CPMAS spectra. Acquisition parameters are listed in Table S1. The underlying data are available at Wolffs et al. (2025).

Table S1: Acquisition parameters the  $^1\text{H}$  and  $^1\text{H}\rightarrow^{13}\text{C}$  CPMAS NMR spectra of Fig. S1

| Parameter                                              | $^1\text{H}$       | $^1\text{H}\rightarrow^{13}\text{C}$ |
|--------------------------------------------------------|--------------------|--------------------------------------|
| Magnetic field (T)                                     | 20.0               | 20.0                                 |
| Temperature                                            | RT                 | RT                                   |
| rotor diameter (mm)                                    | 3.2                | 3.2                                  |
| Pulse sequence                                         | one pulse          | CPMAS                                |
| $^1\text{H}$ rf field strength $90^\circ$ pulse (kHz)  | 99                 | 99                                   |
| $^1\text{H}$ rf field strength during contact (kHz)    | -                  | 74                                   |
| $^{13}\text{C}$ rf field strength during contact (kHz) | -                  | 60                                   |
| Contact time (ms)                                      | -                  | 10                                   |
| Contact ramp shape (%)                                 | -                  | 90-100                               |
| $^1\text{H}$ rf field strength during decoupling (kHz) | -                  | 75                                   |
| Decoupling scheme                                      | -                  | SPINAL                               |
| Recycle delay                                          | $(5 \times T_1)^a$ | $(5 \times T_{1,^1\text{H}})^a$      |
| Spectral width (kHz)                                   | 200                | 100                                  |
| Spinning frequency (kHz)                               | 15                 | 15                                   |
| Number of points                                       | 40000              | 6000-8000                            |
| Number of scans                                        | 16-32              | 256-512                              |

<sup>a</sup> 50, 85, 80, 75 and 160 seconds for  $x = 1.00, 0.75, 0.50, 0.25, 0.00$  respectively.

Table S2: Stoichiometries of the mixed samples based on  $^1\text{H}$  and  $^{13}\text{C}$  NMR, both from this work and the previous owner of the samples, Grüninger et al. (2021). The underlying data are available at Wolffs et al. (2025).

| Sample                                        | $^1\text{H}$ MAS |                  | $^1\text{H}\rightarrow^{13}\text{C}$ CPMAS |                        |
|-----------------------------------------------|------------------|------------------|--------------------------------------------|------------------------|
|                                               | This work        | Grüninger et al. | This work                                  | Grüninger et al.       |
| $\text{MA}_{0.75}\text{FA}_{0.25}\text{Pb}_3$ | 0.75:0.25        | 0.75:0.25        | 0.78:0.22                                  | 0.75:0.24              |
| $\text{MA}_{0.50}\text{FA}_{0.50}\text{Pb}_3$ | 0.51:0.49        | 0.49:0.51        | 0.50:0.50                                  | 0.48:0.52              |
| $\text{MA}_{0.25}\text{FA}_{0.75}\text{Pb}_3$ | 0.25:0.75        | 0.25:0.75        | 0.25:0.75                                  | 0.75:0.74 <sup>a</sup> |

<sup>a</sup> Taken literally from Grüninger et al. but presumably this is supposed to be 0.25:0.74.

## B MAPbI<sub>3</sub> VOCS

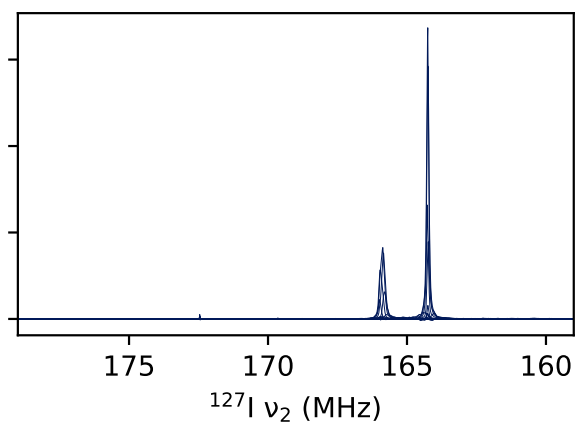

Figure S2: NQR VOCS at 320 K of MAPbI<sub>3</sub>. Fitting the summed spectrum with three peaks (two at  $\sim 166$  MHz) yields Gaussian broadening of  $< 0.08$  MHz and Lorentzian broadening of  $< 0.12$  MHz.

## C $^{127}\text{I}$ NQR fitting parameters

Table S3: Manually determined optimal fitting parameters of mixed cation perovskite  $^{127}\text{I}$  NQR spectra at low and high temperature under the constraint that both the shift per first shell MA  $\Delta\nu_{\text{MA}}[1]$  and the shift per second shell MA  $\Delta\nu_{\text{MA}}[2]$  are negative. The underlying data are available at Wolffs et al. (2025).

| Temperature (K)                  | MA75   |        | MA50   |        | MA25   |                  |
|----------------------------------|--------|--------|--------|--------|--------|------------------|
|                                  | 293    | 420    | 293    | 420    | 293    | 420 <sup>a</sup> |
| $\nu_0$ (MHz)                    | 172.35 | 171.45 | 171.7  | 170.55 | 172.90 | 171.60           |
| $\Delta\nu_{\text{MA}}[1]$ (MHz) | -0.500 | -0.650 | -0.550 | -0.500 | -0.550 | -0.600           |
| $\Delta\nu_{\text{MA}}[2]$ (MHz) | -0.600 | -0.520 | -0.412 | -0.375 | -0.440 | -0.540           |
| S                                | 0.100  | 0.300  | 0.250  | 0.300  | 0.325  | 0.325            |
| Gauss (MHz)                      | 0.1    | 0.1    | 0.1    | 0.1    | 0.1    | 0.1              |
| Lorentz (MHz)                    | 0.95   | 0.80   | 0.70   | 0.60   | 0.60   | 0.60             |

<sup>a</sup> Fits at these temperatures are very poor.

Table S4: Manually determined optimal fitting parameters of mixed cation perovskite  $^{127}\text{I}$  NQR spectra at low and high temperature under the constraint that the shift per first shell MA  $\Delta\nu_{\text{MA}}[1]$  is positive and the shift per second shell MA  $\Delta\nu_{\text{MA}}[2]$  is negative. The underlying data are available at Wolffs et al. (2025).

| Temperature (K)                  | MA75   |        | MA50   |        | MA25             |                  |
|----------------------------------|--------|--------|--------|--------|------------------|------------------|
|                                  | 293    | 420    | 293    | 420    | 293 <sup>a</sup> | 420 <sup>a</sup> |
| $\nu_0$ (MHz)                    | 167.85 | 168.30 | 169.48 | 168.40 | 171.90           | 171.00           |
| $\Delta\nu_{\text{MA}}[1]$ (MHz) | 0.75   | 0.55   | 0.60   | 0.60   | 0.50             | 0.65             |
| $\Delta\nu_{\text{MA}}[2]$ (MHz) | -0.488 | -0.605 | -0.420 | -0.390 | -0.450           | -0.585           |
| S                                | 0.30   | 0.25   | 0.20   | 0.20   | 0.35             | 0.00             |
| Gauss (MHz)                      | 0.1    | 0.1    | 0.1    | 0.1    | 0.1              | 0.1              |
| Lorentz (MHz)                    | 0.70   | 0.90   | 0.70   | 0.60   | 0.60             | 0.65             |

<sup>a</sup> Very poor fits.

Table S5: Manually determined optimal fitting parameters of mixed cation perovskite  $^{127}\text{I}$  NQR spectra at low and high temperature under the constraint that both the shift per first shell MA  $\Delta\nu_{\text{MA}}[1]$  and the shift per second shell MA  $\Delta\nu_{\text{MA}}[2]$  are positive. The underlying data are available at Wolffs et al. (2025).

| Temperature (K)                  | MA75             |                  | MA50   |        | MA25             |        |
|----------------------------------|------------------|------------------|--------|--------|------------------|--------|
|                                  | 293 <sup>a</sup> | 420 <sup>a</sup> | 293    | 420    | 293 <sup>a</sup> | 420    |
| $\nu_0$ (MHz)                    | 162.10           | 161.00           | 166.10 | 165.25 | 170.35           | 168.55 |
| $\Delta\nu_{\text{MA}}[1]$ (MHz) | 0.65             | 0.60             | 0.60   | 0.60   | 0.60             | 0.60   |
| $\Delta\nu_{\text{MA}}[2]$ (MHz) | 0.455            | 0.540            | 0.420  | 0.390  | 0.450            | 0.660  |
| S                                | 0.3              | 0.000            | 0.200  | 0.175  | 0.000            | 0.150  |
| Gauss (MHz)                      | 0.1              | 0.1              | 0.1    | 0.1    | 0.1              | 0.1    |
| Lorentz (MHz)                    | 0.70             | 0.95             | 0.70   | 0.70   | 0.60             | 0.70   |

<sup>a</sup> Very poor fits.

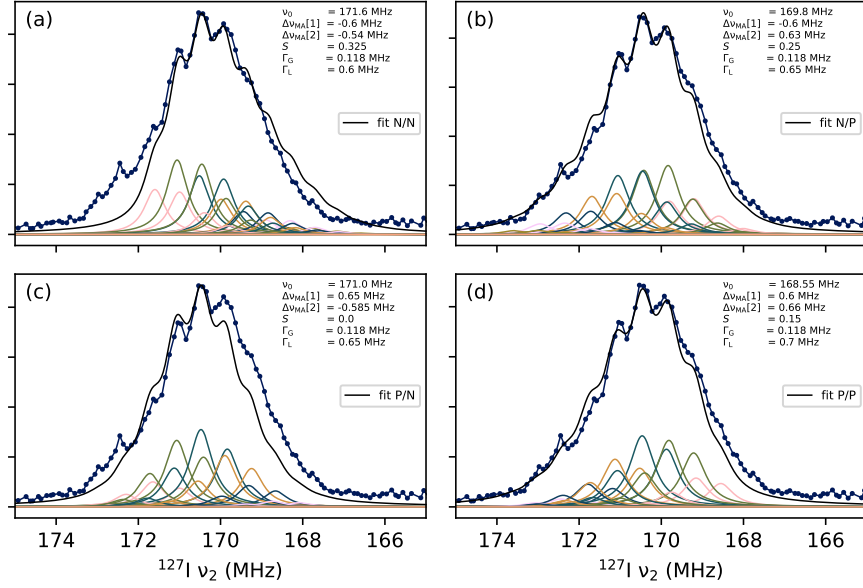

Figure S3: Manual fits of  $\text{MA}_{0.25}\text{FA}_{0.75}\text{PbI}_3$  at 420 K. The shifts per first/second shell methylammonium  $\Delta\nu_{\text{MA}}$  [1]/[2] are constrained to being positive (P) or negative (N): (a): N/N, (b): N/P, (c): P/N, (d): P/P.

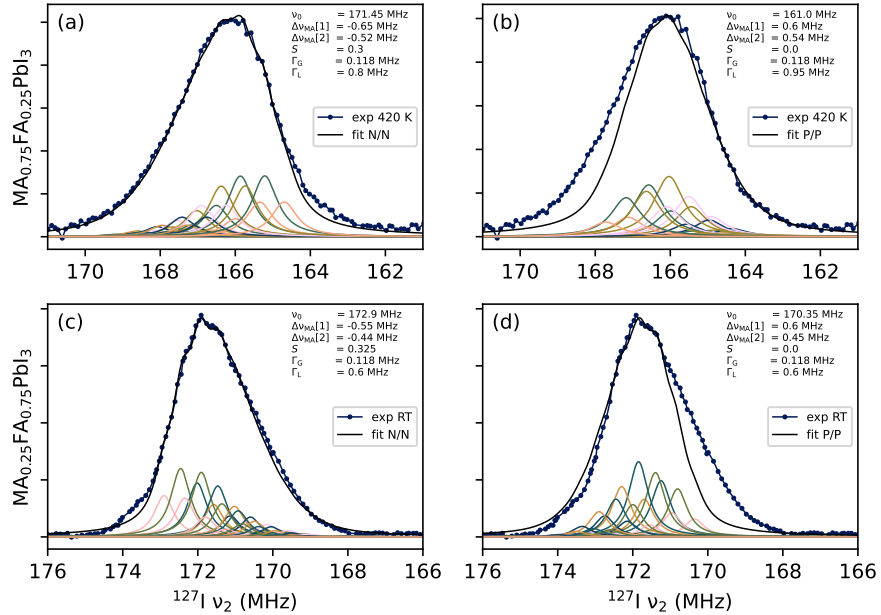

Figure S4: Manual fits of high temperature  $\text{MA}_{0.75}\text{FA}_{0.25}\text{PbI}_3$  (a,b) and room temperature  $\text{MA}_{0.25}\text{FA}_{0.75}\text{PbI}_3$  (c,d). The shifts per first/second shell MA  $\Delta\nu_{\text{MA}}$  [1]/[2] are constrained to being positive (P) or negative (N): (a,c): N/N, (b,d): P/P.

## D Quantum chemical calculations

Detailed results of the  $^{127}\text{I}$  NQR  $\nu_2$  resonance simulations using the four models from Sec. 2.2. The spectra were modelled as a convolution with a Gaussian with standard deviation  $\sigma = 0.1$  MHz.

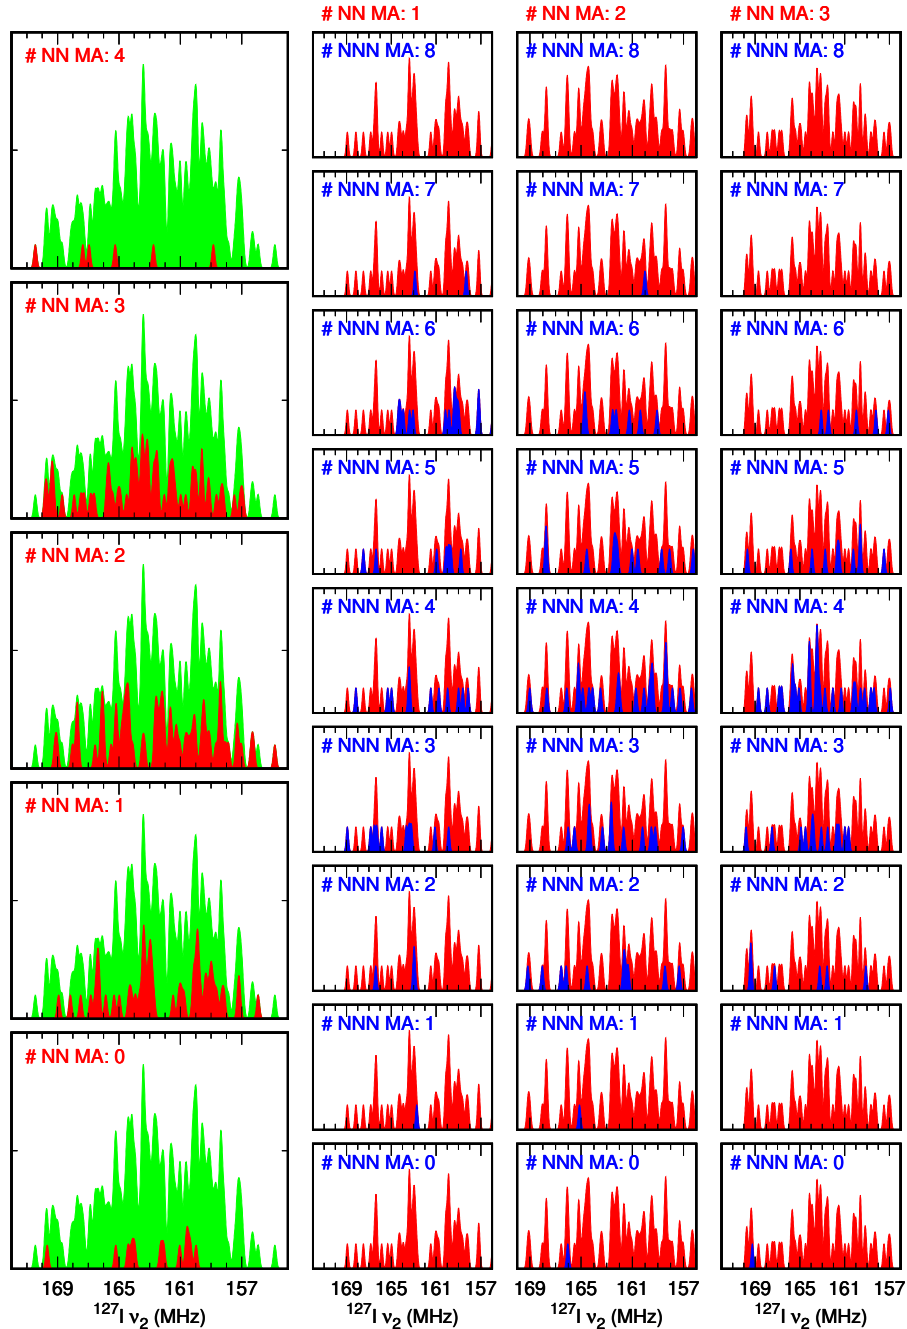

Figure S5: MD-predicted  $^{127}\text{I}$   $\nu_2$  distributions of  $\text{MA}_{0.50}\text{FA}_{0.50}\text{PbI}_3$  at 400 K, using a  $4 \times 4 \times 4$  unit cell, i.e., model **DFT-1**. The distribution for all 192  $^{127}\text{I}$  is green, the distributions with fixed number of nearest neighbour (NN) MA are in red. Column 2 (3) [4] shows a the distribution for varying number of next nearest neighbour (NNN) MA (in blue) for a single (two) [three] MA NN.

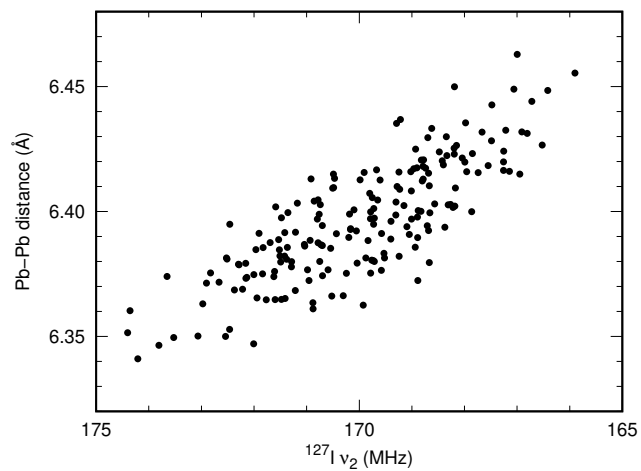

Figure S6: Scatter plot of Pb-Pb distances and corresponding  $^{127}\text{I}$   $\nu_2$  of the iodide bridging the two Pb ions using the time-averaged model **DFT-2**.



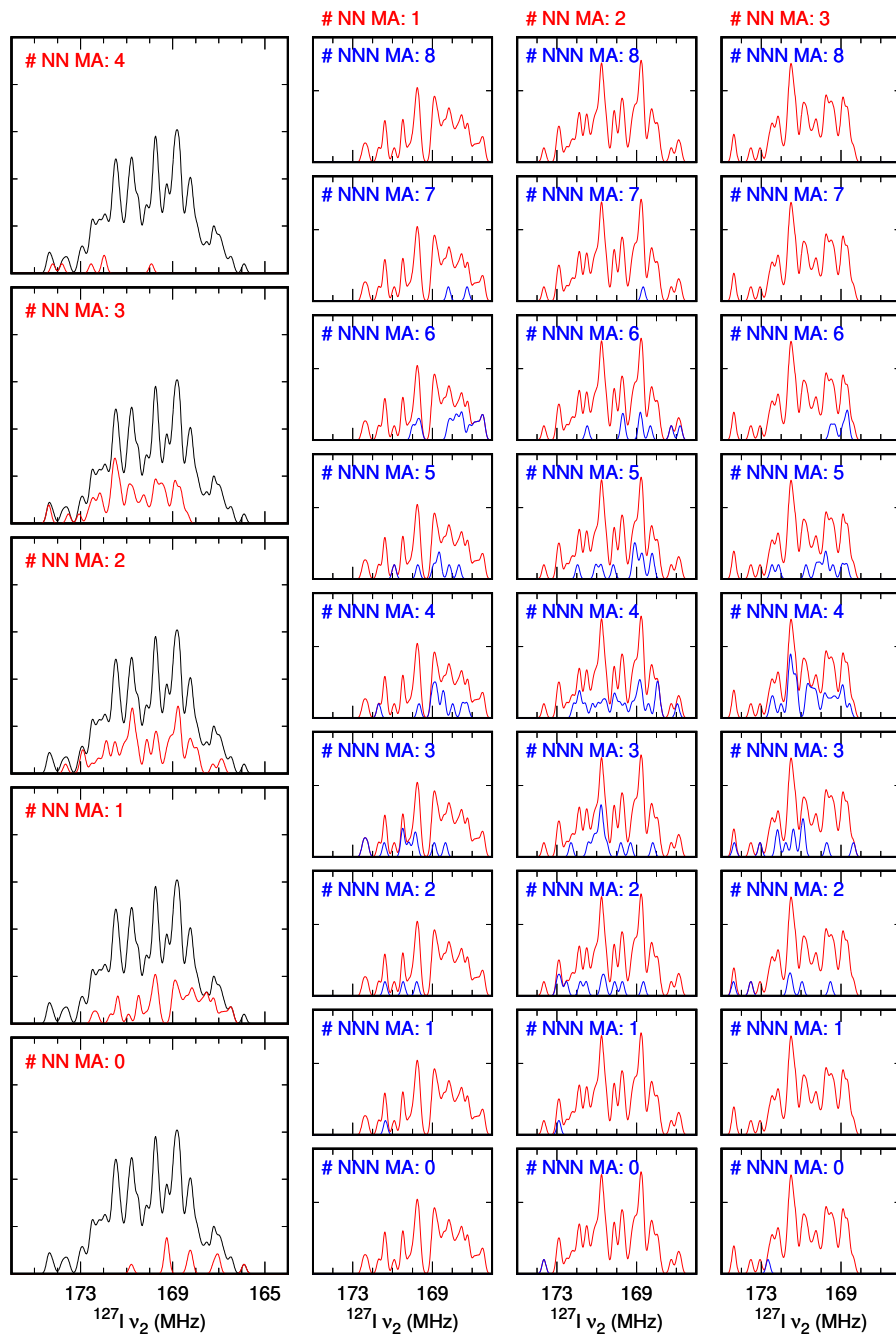

Figure S7: Distributions of  $^{127}\text{I } v_2$  according to DFT-2 (cf. Fig. S5)

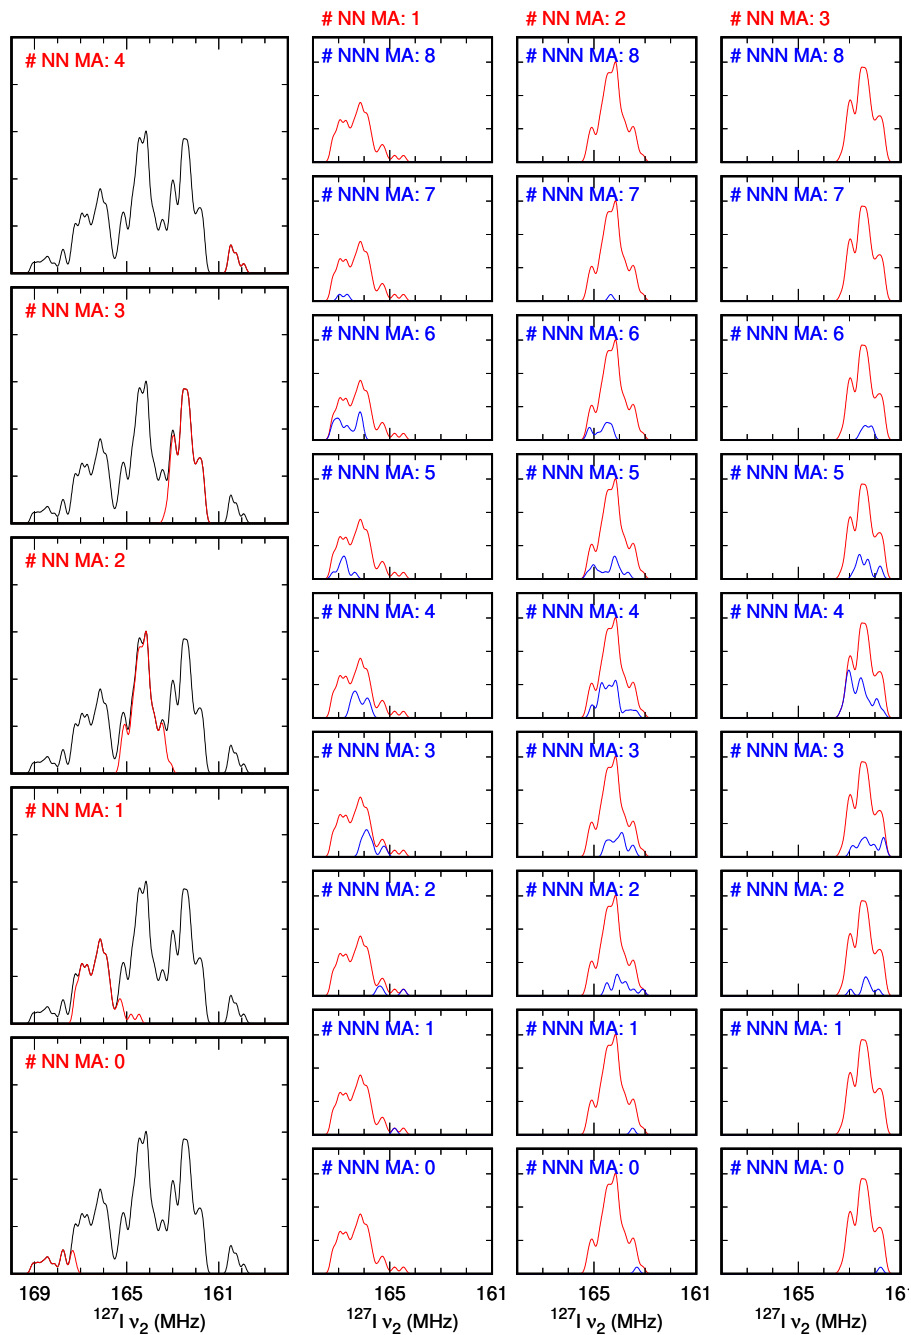

Figure S8: Distributions of  $^{127}\text{I } v_2$  according to DFT-3 (cf. Fig. S5)

## References

- Grüninger, H., Bokdam, M., Leupold, N., Tinnemans, P., Moos, R., De Wijs, G. A., Panzer, F., and Kentgens, A. P. M.: Microscopic (Dis)order and Dynamics of Cations in Mixed FA/MA Lead Halide Perovskites, *The Journal of Physical Chemistry C*, 125, 1742–1753, <https://doi.org/10.1021/acs.jpcc.0c10042>, 2021.
- Wolffs, J. W., Gómez Badillo, J. S., Janssen, G. E., De Wijs, G. A., and Kentgens, A. P.: Automated wide-line nuclear quadrupole resonance of mixed-cation lead halide perovskites, <https://doi.org/10.34973/cwk8-we61>, 2025.
